# Supplementary material for: Antibody Responses and Reactogenicity of a Heterologous, Full-Dose Messenger RNA-1273 Booster in Heavily SARS-CoV-2–Exposed CoronaVac-Vaccinated Health-Care Workers in Indonesia: A Real-World Observational Study
Source: PubMed Central journal article supplement (PMC9833072; doi:10.4269/ajtmh.22-0256), 2022-11-30
Supplement: tpmd220256.SD1.pdf [file tpmd220256.SD1.pdf]

**Figure S1. Study participant timeline**

Primary Vaccine : Coronavac  
Booster Vaccine : mRNA-1273

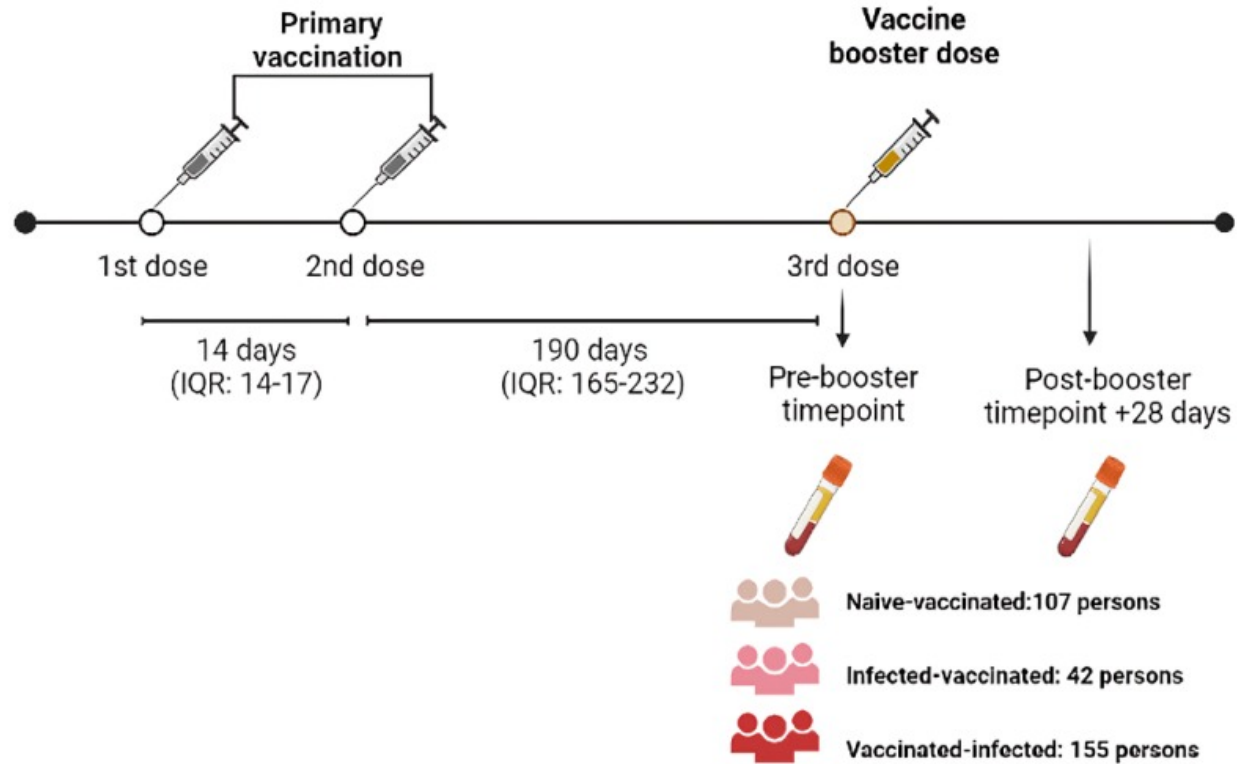

**Figure S2.** Anti-spike binding antibody titers before and after mRNA-1273 booster

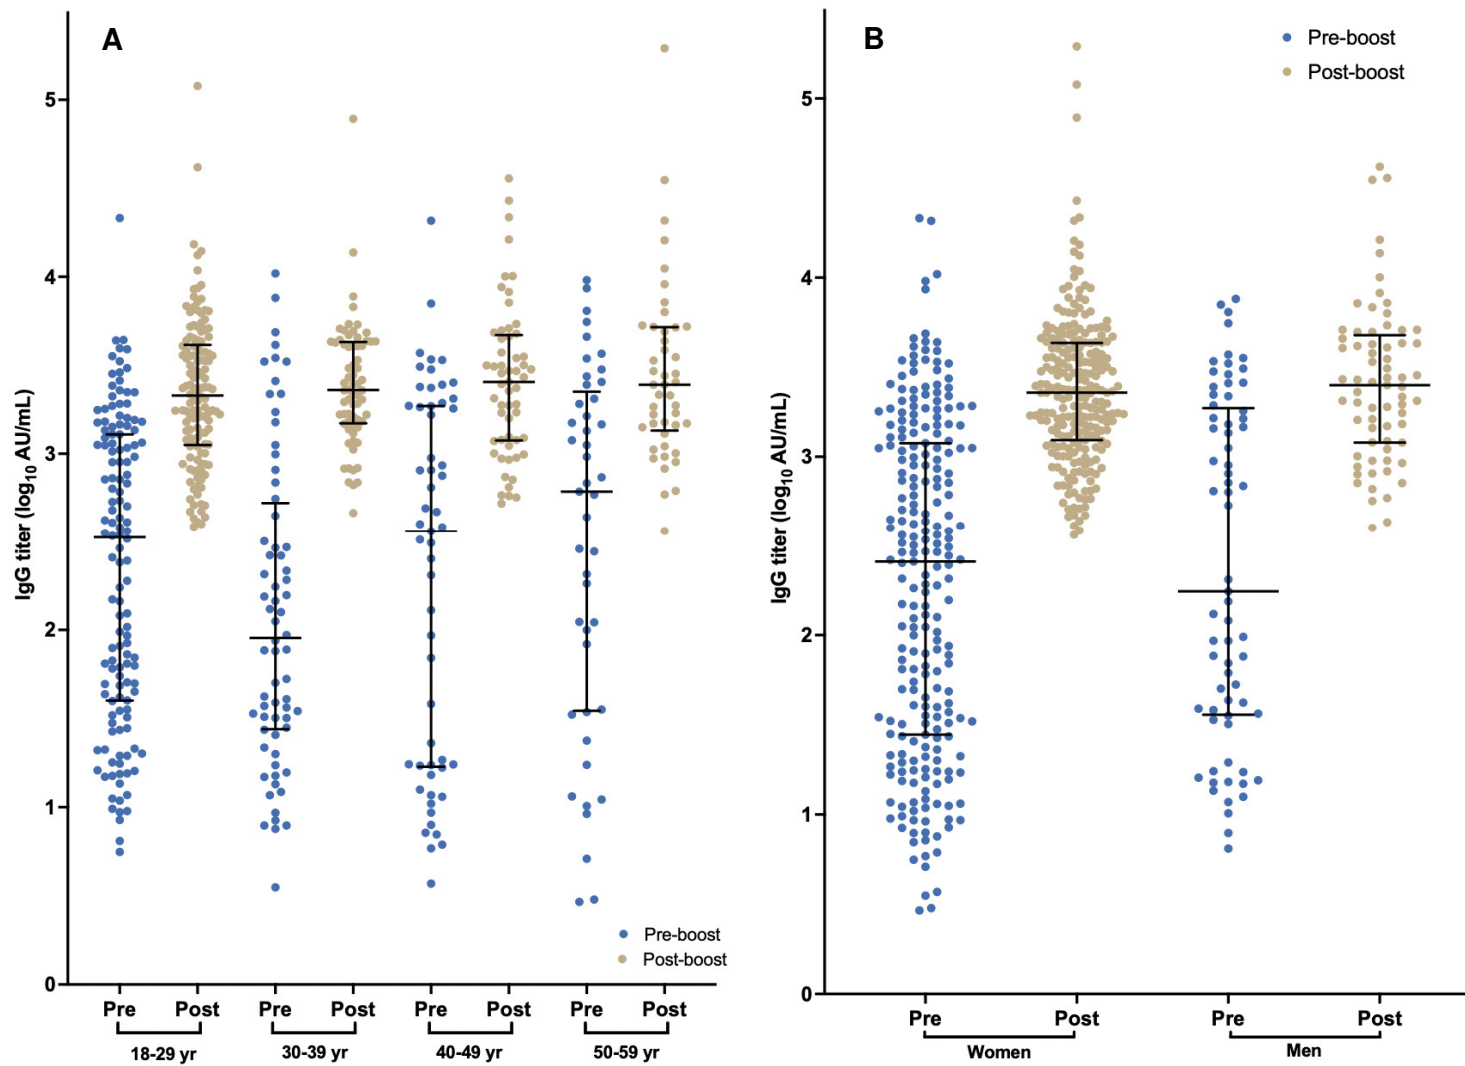

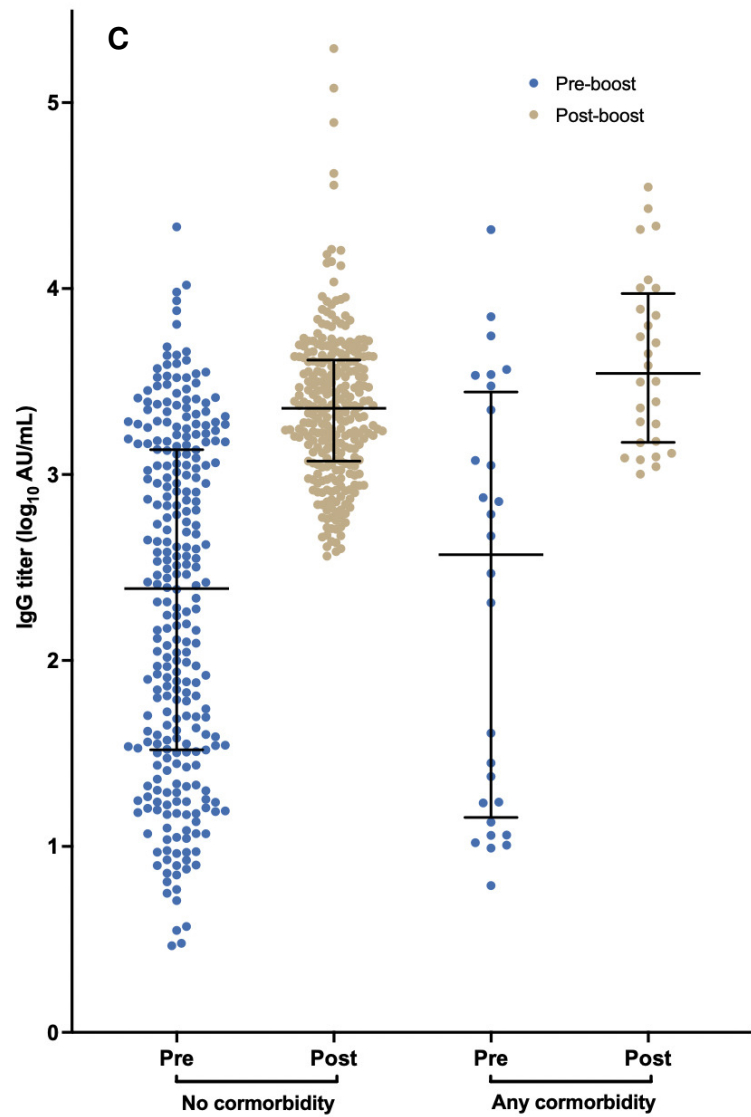

Panels (A-C) show dot plots of pre and post-mRNA-1273-booster binding antibody titers, by (A) age groups, (B) sex, (C) comorbidity.

IgG binding antibody titers shown as binding antibody units (BAU)/mL (according to WHO International Standard).

**Figure S3.** Correlations between binding and neutralizing antibody titers before and after mRNA-1273 booster

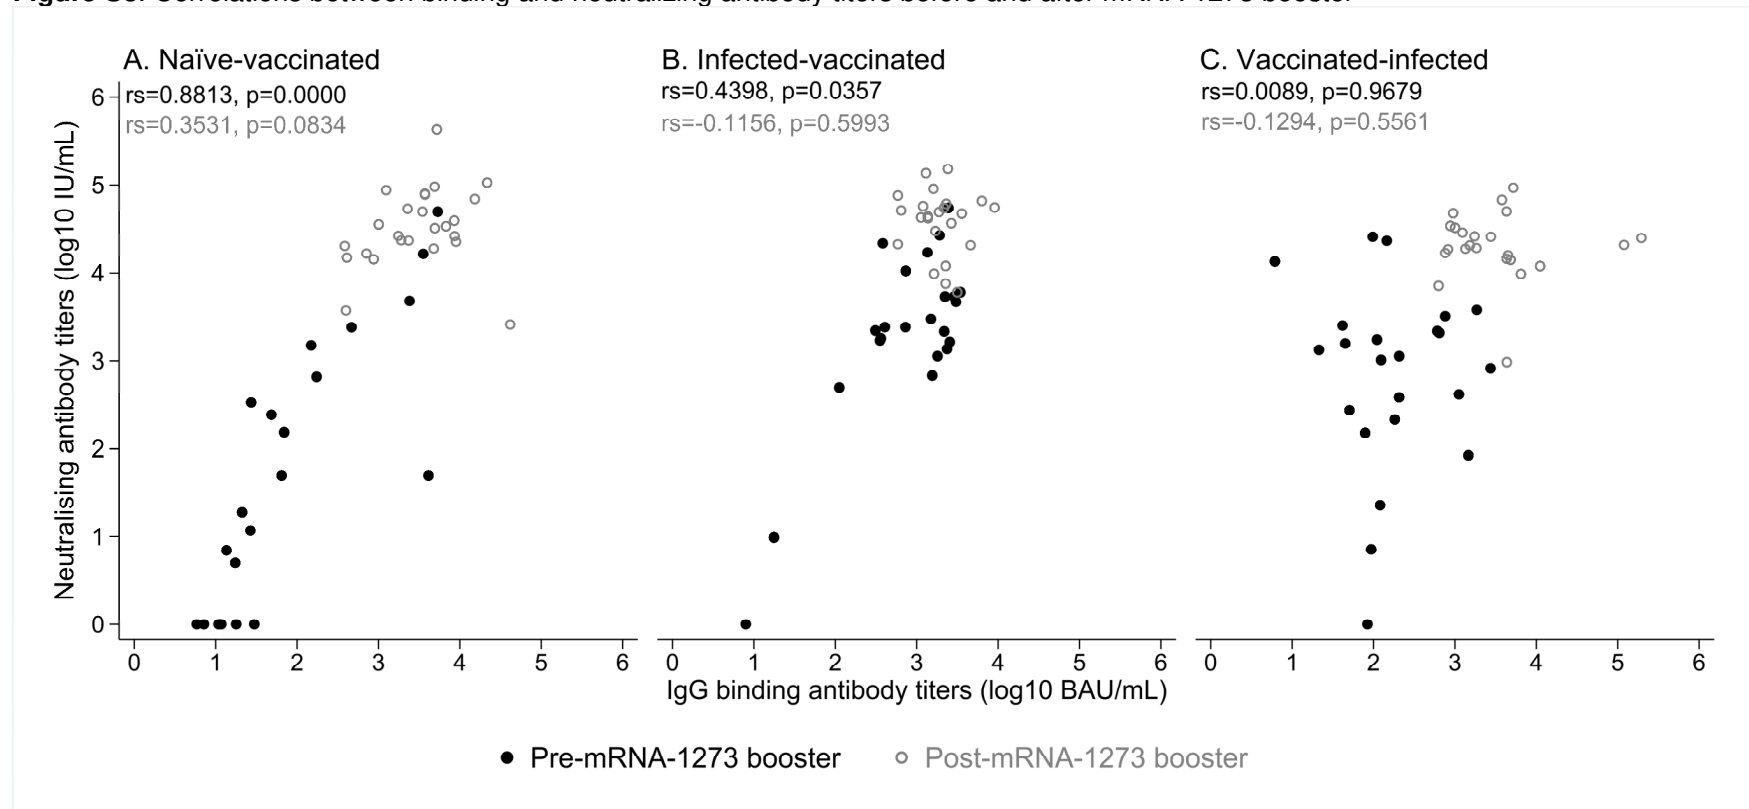

Scatter plot showing correlations between pre and post-mRNA-1273-booster binding and neutralizing antibody titers, overall and by previous SARS-CoV-2 infection. IgG titers shown as binding antibody units (BAU)/mL (according to WHO International Standard). Neutralizing antibodies shown as IU/mL.

**Table S1.** Anti-spike titers before and Day 28 after mRNA-1273 booster

|                                                         | <b>Median pre-mRNA-1273-booster (IQR)</b> | <b>Median post- mRNA-1273-booster (IQR)</b> | <b>Fold change</b> | <b>p-value</b> |
|---------------------------------------------------------|-------------------------------------------|---------------------------------------------|--------------------|----------------|
| Overall                                                 | 249.8 (31.9-1389.2)                       | 2312.8 (1225.8-4324.3)                      | 9.3                | <0.0001        |
| Age                                                     |                                           |                                             |                    |                |
| 21-29                                                   | 334.9 (39.9-1285.1)                       | 2132.8 (1128.2-4066.2)                      | 6.4                | <0.0001        |
| 30-39                                                   | 90.2 (27.7-500.4)                         | 2292.2 (1500.2-4271.4)                      | 25.0               | <0.0001        |
| 40-49                                                   | 363.1 (17.1-1856.7)                       | 2543.9 (1197.1-4594.4)                      | 7.0                | <0.0001        |
| 50-59                                                   | 611.0 (35.5-2048.7)                       | 2455.2 (1410.2-5177.3)                      | 2.8                | 0.0001         |
| Sex                                                     |                                           |                                             |                    |                |
| Women                                                   | 257.1 (27.9-1191.1)                       | 2278.4 (1238.2-4315.4)                      | 8.9                | <0.0001        |
| Men                                                     | 175.2 (36.4-1804.3)                       | 2510.6 (1202.7-4570.3)                      | 14.3               | <0.0001        |
| Previous SARS-CoV2 infection - N episodes               |                                           |                                             |                    |                |
| 0                                                       | 31.8 (14.8-84.3)                          | 2833.6 (1227.6-4686.7)                      | 89.1               | <0.0001        |
| 1                                                       | 808.5 (193.5-2049.1)                      | 2163.0 (1301.4-4033.3)                      | 2.7                | <0.0001        |
| 2                                                       | 257.1 (61.5-994.1)                        | 1741.6 (823.6-2492.8)                       | 6.8                | 0.0010         |
| Previous SARS-CoV-2 infection - Timing                  |                                           |                                             |                    |                |
| Naïve-vaccinated                                        | 31.8 (14.8-84.3)                          | 2833.6 (1227.6-4686.7)                      | 89.1               | <0.0001        |
| Infected-vaccinated                                     | 124.9 (41.7-760.3)                        | 1985.5 (1153.0-4077.5)                      | 15.9               | <0.0001        |
| Vaccinated-infected                                     | 962.6 (292.0-2115.5)                      | 2136.4 (1299.3-3854.6)                      | 2.2                | <0.0001        |
| Time interval between second dose and mRNA-1273 booster |                                           |                                             |                    |                |
| Quartile 1 (66-165 days)                                | 80.1 (34.3-211.6)                         | 2369.6 (1202.0-4324.3)                      | 24.6               | <0.0001        |
| Quartile 2 (165-190 days)                               | 33.0 (15.5-294.0)                         | 2943.0 (1482.5-4686.7)                      | 94.6               | <0.0001        |
| Quartile 3 (190-232 days)                               | 709.4 (49.6-1596.1)                       | 2522.3 (1303.6-5305.1)                      | 3.4                | <0.0001        |
| Quartile 4 (232-267 days)                               | 1439.5 (533.8-2226.6)                     | 1714.7 (1132.5-2764.0)                      | 1.2                | 0.0037         |
| Comorbidity                                             |                                           |                                             |                    |                |
| 0                                                       | 243.9 (33.1-1359.9)                       | 2269.9 (1180.7-4115.5)                      | 9.3                | <0.0001        |
| ≥1                                                      | 380.9 (15.3-2608.7)                       | 3510.3 (1494.9-8898.8)                      | 9.2                | <0.0001        |

Data are expressed as binding antibody units (BAU)/mL (according to WHO International Standard)

**Table S2.** Adverse reactions within seven days after receiving the mRNA-1273 booster dose

|                       | <b>N (%)</b> | <b>Grade 1</b> | <b>Grade 2</b> | <b>Grade 3</b> | <b>Grade 4</b> | <b>Unknown</b> |
|-----------------------|--------------|----------------|----------------|----------------|----------------|----------------|
| Any adverse reactions | 300 (98.68)  | 86 (28.29)     | 131 (43.09)    | 59 (19.41)     | 24 (7.89)      | 0 (0.00)       |
| Any local reaction    | 293 (96.38)  | 103 (33.88)    | 134 (44.08)    | 43 (14.14)     | 13 (4.28)      | 0 (0.00)       |
| Pain                  | 290 (95.39)  | 107 (35.20)    | 126 (41.45)    | 43 (14.14)     | 13 (4.28)      | 1 (0.33)       |
| Swelling              | 183 (60.20)  | 113 (37.17)    | 52 (17.11)     | 17 (5.59)      | 0 (0.00)       | 1 (0.33)       |
| Redness               | 110 (36.18)  | 74 (24.34)     | 32 (10.53)     | 4 (1.32)       | 0 (0.00)       | 0 (0.00)       |
| Any systemic reaction | 276 (90.79)  | 120 (39.47)    | 87 (28.62)     | 49 (16.12)     | 19 (6.25)      | 1 (0.33)       |
| Myalgia               | 192 (63.16)  | 93 (30.59)     | 61 (20.07)     | 31 (10.20)     | 7 (2.30)       | 0 (0.00)       |
| Fever/chills          | 189 (62.17)  | 110 (36.18)    | 44 (14.47)     | 20 (6.58)      | 7 (2.30)       | 6 (1.97)       |
| Headache              | 184 (60.53)  | 95 (31.25)     | 45 (14.80)     | 38 (12.50)     | 4 (1.32)       | 0 (0.00)       |
| Fatigue               | 168 (55.26)  | 87 (28.62)     | 52 (17.11)     | 24 (7.89)      | 4 (1.32)       | 1 (0.33)       |
| Arthralgia            | 143 (47.04)  | 61 (20.07)     | 46 (15.13)     | 31 (10.20)     | 5 (1.64)       | 0 (0.00)       |
| Nausea                | 95 (31.25)   | 57 (18.75)     | 25 (8.22)      | 8 (2.63)       | 3 (0.99)       | 0 (0.00)       |
| Anaphylaxis           | 0 (0.0)      | 0 (0.00)       | 0 (0.00)       | 0 (0.00)       | 0 (0.00)       | 0 (0.00)       |

The table shows solicited adverse reactions, that were verified and graded for severity by the study physician. Severity grading: 1) mild (does not or minimally interfere with usual social and functional activities); 2) moderate (interferes with usual social and functional activities); 3) severe (causing inability to perform usual social and functional activities); 4) disrupting/impairing activities of daily living (ADL). No participants required hospitalization or died.

**Table S3.** Factors associated with occurrence of severe or disrupting adverse reactions

|                                                                                    | Univariable |                  |                   | Multivariable |                  |              |
|------------------------------------------------------------------------------------|-------------|------------------|-------------------|---------------|------------------|--------------|
|                                                                                    | OR          | 95%CI            | P                 | OR            | 95%CI            | P            |
| Age, per decade increase                                                           | 0.69        | 0.53-0.90        | 0.006             | <b>0.71</b>   | <b>0.54-0.92</b> | <b>0.011</b> |
| Sex                                                                                |             |                  |                   |               |                  |              |
| Men                                                                                | 1 (ref)     |                  |                   | 1 (ref)       |                  |              |
| Women                                                                              | 1.63        | 0.85-3.130       | 0.139             | 1.60          | 0.81-3.17        | 0.174        |
| Comorbidities                                                                      |             |                  |                   |               |                  |              |
| No                                                                                 | 1 (ref)     |                  |                   | -             | -                | -            |
| Yes                                                                                | 0.88        | 0.36-2.15        | 0.774             | -             | -                | -            |
| Past COVID-19                                                                      |             |                  |                   |               |                  |              |
| No                                                                                 | 1 (ref)     |                  |                   | 1 (ref)       |                  |              |
| Yes                                                                                | 1.73        | 0.99-3.03        | 0.053             | 1.20          | 0.59-2.44        | 0.619        |
| Pre-mRNA-1273-booster binding antibody titer                                       | 1.43        | 1.08-1.89        | 0.013             | 0.73          | 0.33-1.61        | 0.431        |
| Post-mRNA-1273-booster binding antibody titer                                      | 0.58        | 0.31-1.10        | 0.095             | -             | -                | -            |
| Change in binding antibody titers between before and after mRNA-1273 boost         | 0.69        | 0.53-0.89        | 0.004             | 0.65          | 0.33-1.30        | 0.225        |
| Interval between first and second vaccination, per day increase                    | 0.97        | 0.93-1.00        | 0.059             | 0.99          | 0.96-1.02        | 0.484        |
| Interval between second vaccination and mRNA-1273 booster dose, per month increase | <b>1.51</b> | <b>1.25-1.83</b> | <b>&lt;0.0001</b> | <b>1.37</b>   | <b>1.09-1.72</b> | <b>0.007</b> |

Table shows univariable and multivariable logistic regression with occurrence of any severe or ADL-disrupting adverse reaction (within seven days after receiving the mRNA-1273 booster dose) as the dependent variable.

Severe or disrupting adverse reactions were defined as causing inability to perform usual social and functional activities or disrupting/impairing activities of daily living (ADL), respectively.

Interval between first and second dose, post-mRNA-1273-booster binding antibody titer, and presence of any comorbidity were not associated with the occurrence of severe or disrupting adverse reaction.
